# Supplementary material
Source: Springer Nature journal article supplement (https://www.springermedizin.de/resource/supplementary/12889_2011_3730_MOESM1_ESM.pdf/9489968)

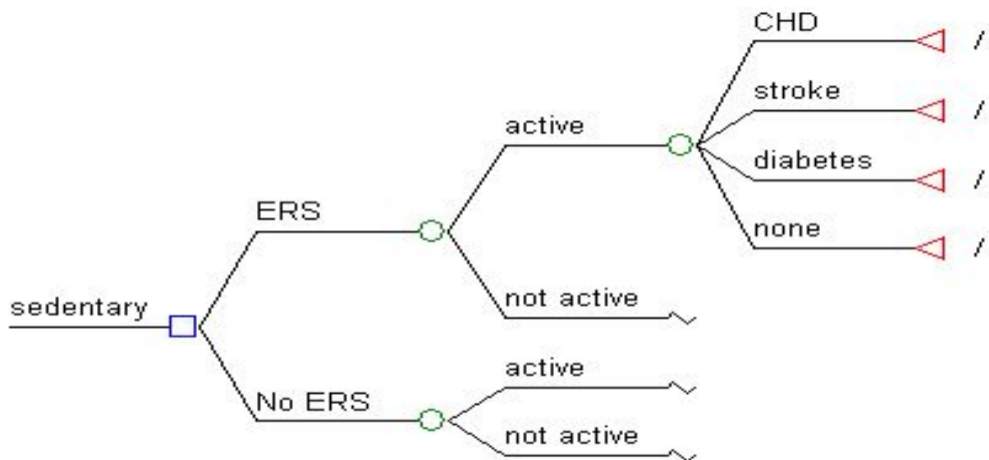

Supplement: MOESM1 [file 9489968]
